# Supplementary material for: Fabrication of bismuth subcarbonate nanotube arrays from bismuth citrate
Source: Royal Society of Chemistry journal article supplement (doi:10.1039/b601764a), 2006-01-01

## Supplementary Information

### Fabrication of Bismuth Subcarbonate Nanotubes from Bismuth Citrate

Rong Chen,<sup>a</sup> Man Ho So,<sup>a</sup> Jun Yang,<sup>b</sup> Feng Deng,<sup>b</sup> Chi-Ming Che<sup>a</sup> and Hongzhe Sun<sup>\*,a</sup>

<sup>a</sup> *Department of Chemistry and Open Laboratory of Chemical Biology of the Institute of Molecular Technology for Drug Discovery and Synthesis, The University of Hong Kong, Pokfulam Road, Hong Kong, China*

<sup>b</sup> *State Key Laboratory of Magnetic Resonance and Atomic and Molecular Physics, Wuhan Institute of Physics and Mathematics, the Chinese Academy of Sciences, Wuhan, China*

#### Part I.

**Materials.** All chemicals were purchased from Sigma-Aldrich Chemical Co. unless otherwise noted. Analytical grade organic solvents and doubly distilled deionized water were used throughout the experiments.

**Instrumentation.** The XRD spectrum was recorded with Philips PW1830 powder X-ray diffractometer. UV-vis spectra were taken using Varian Cary 50 spectrophotometer. TEM images of the silver nanoparticles were taken with JEOL JEM-2000 transmission electron microscopy, using an accelerating voltage of 200 kV, and were carried out on the Philips Tecnai 20 equipped with Oxford incax-sight EDX attachment using an accelerating voltage of 200 kV and Philips EM208s using an accelerating voltage of 80 kV. Solid-state <sup>13</sup>C NMR spectrum was recorded on a Varian Infinity plus-400 spectrometer equipped with a Chemagnetic 2.5 mm double resonance probe at 100.4 MHz, using CP/MAS.

## Part II. Figures

**Figure S1.** Power XRD spectrum of  $(\text{BiO})_2\text{CO}_3$  nanotubes in the absence of CTAB.

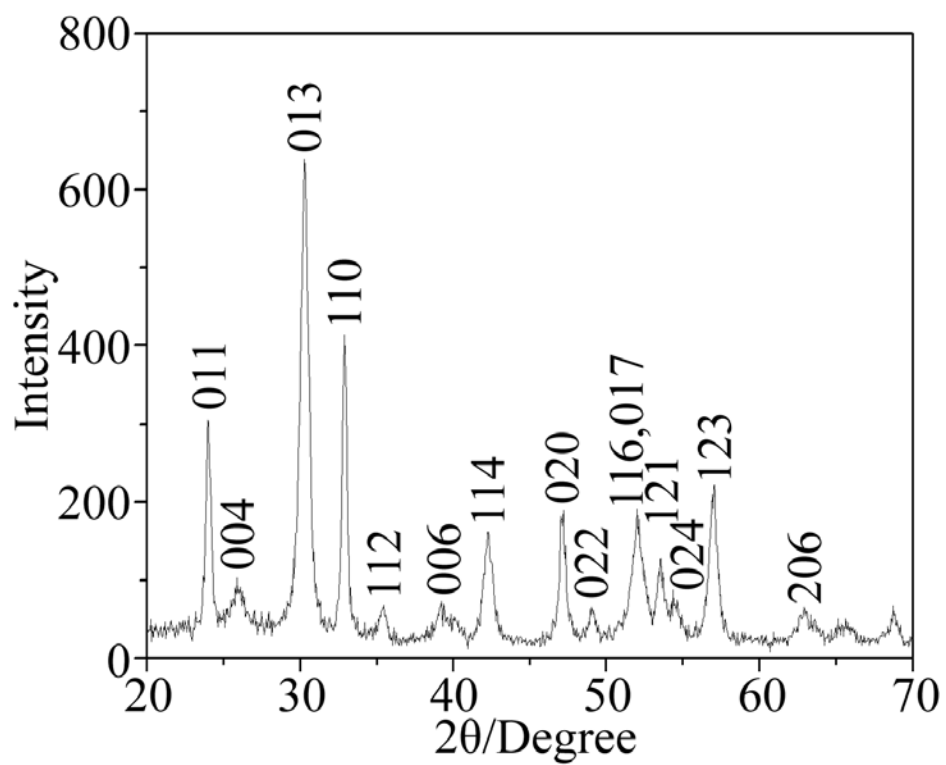

**Figure S2.** XPS spectrum of  $(\text{BiO})_2\text{CO}_3$  nanotubes in the absence of CTAB (a) and their high-resolution XPS spectra at carbon region ( $\text{C}(1s)$ ) (b), oxygen region ( $\text{O}(1s)$ ) (c) and bismuth region ( $\text{Bi}(4f)$ ) (d).

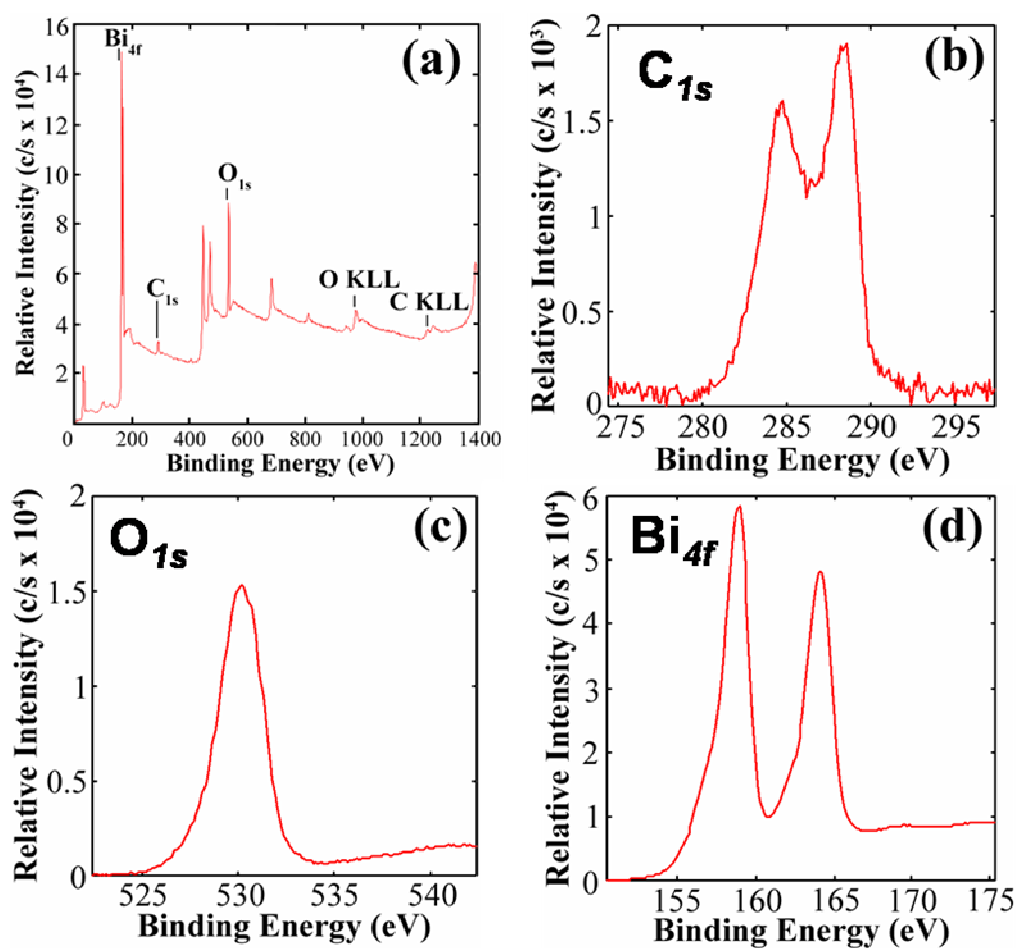

**Figure S3.** Scanning electron microscopy (SEM) images of the  $(\text{BiO})_2\text{CO}_3$  nanotubes (a) low magnification and (b) high magnification.

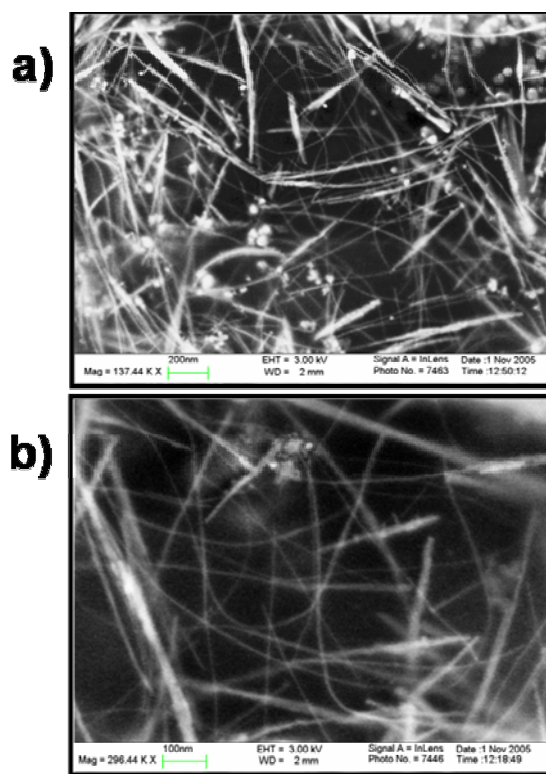

**Figure S4.** Diameter distribution profile of the  $(\text{BiO})_2\text{CO}_3$  nanotubes.

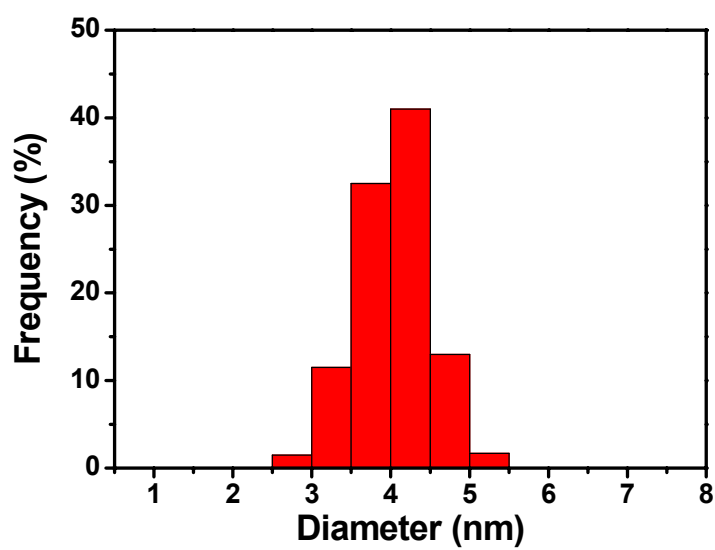

**Figure S5.** TEM images of  $(\text{BiO})_2\text{CO}_3$  nanoparticle line from  $(\text{BiO})_2\text{CO}_3$  nanotube after long time beam irradiation.

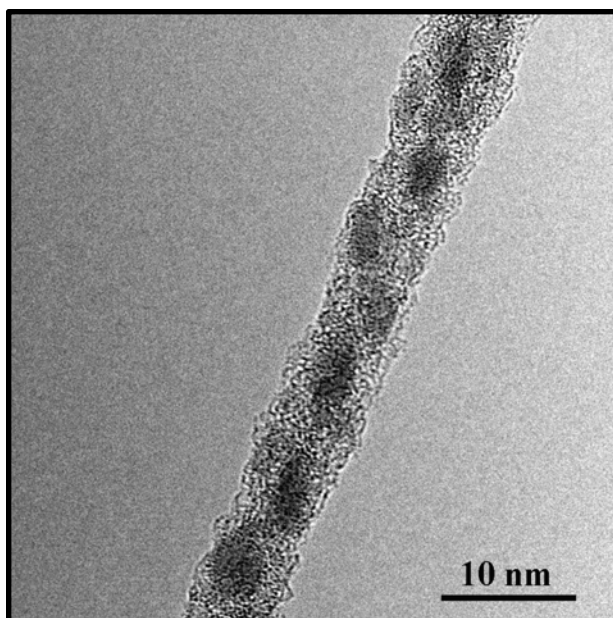

**Figure S6.** EDX spectrum of the  $(\text{BiO})_2\text{CO}_3$  nanotubes lying on the hole of copper grid.

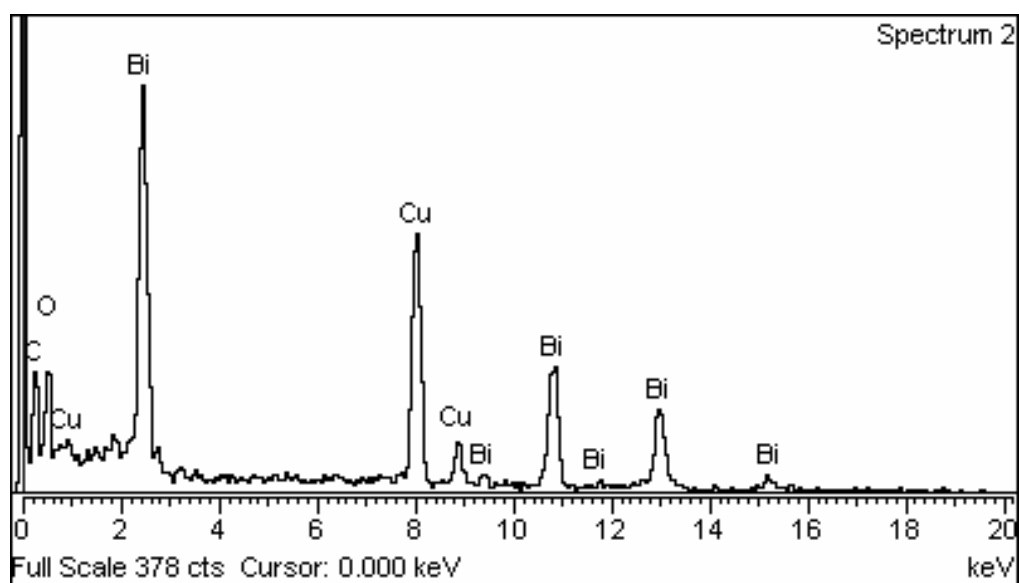

**Figure S7.** Solid-state  $^{13}\text{C}$  MAS NMR spectrum of  $(\text{BiO})_2\text{CO}_3$  nanotubes. Note that the peak at 168 ppm in the  $^{13}\text{C}$  spectrum is characteristic for bismuth bound carbonate.

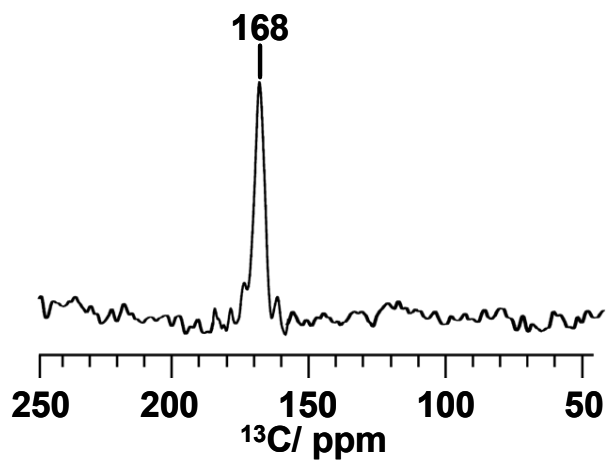



**Figure S8.** Schematic illustration of the function of the capping agent CTAB in the synthesis of  $(\text{BiO})_2\text{CO}_3$  nanotubes. Note that well-segregated individual  $(\text{BiO})_2\text{CO}_3$  nanotubes are formed in (c) and bundles of nanotube are formed in (e).

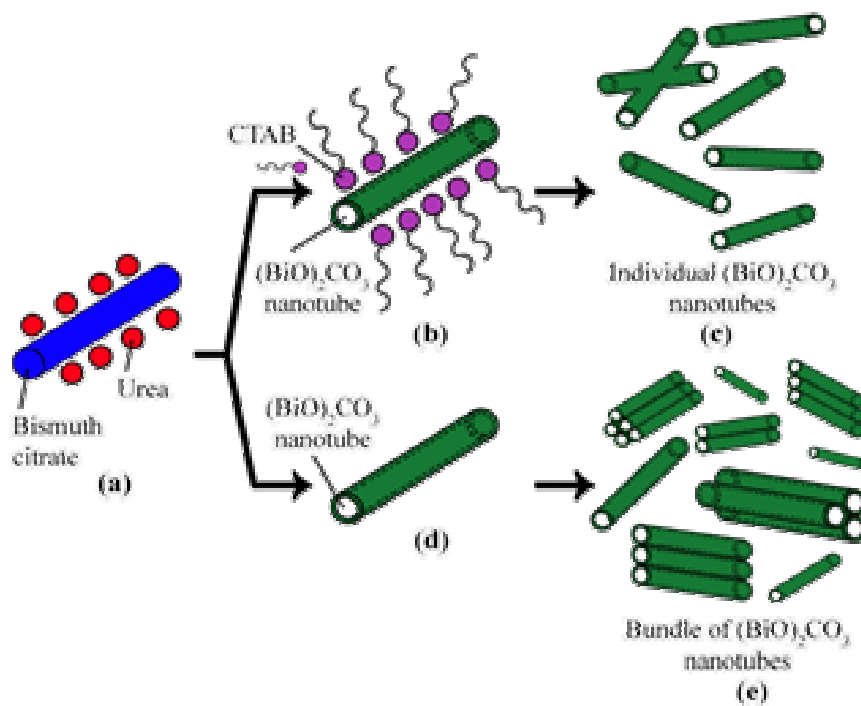

**Figure S9.** TEM images of selected  $(\text{BiO})_2\text{CO}_3$  nanotubes at different magnification.

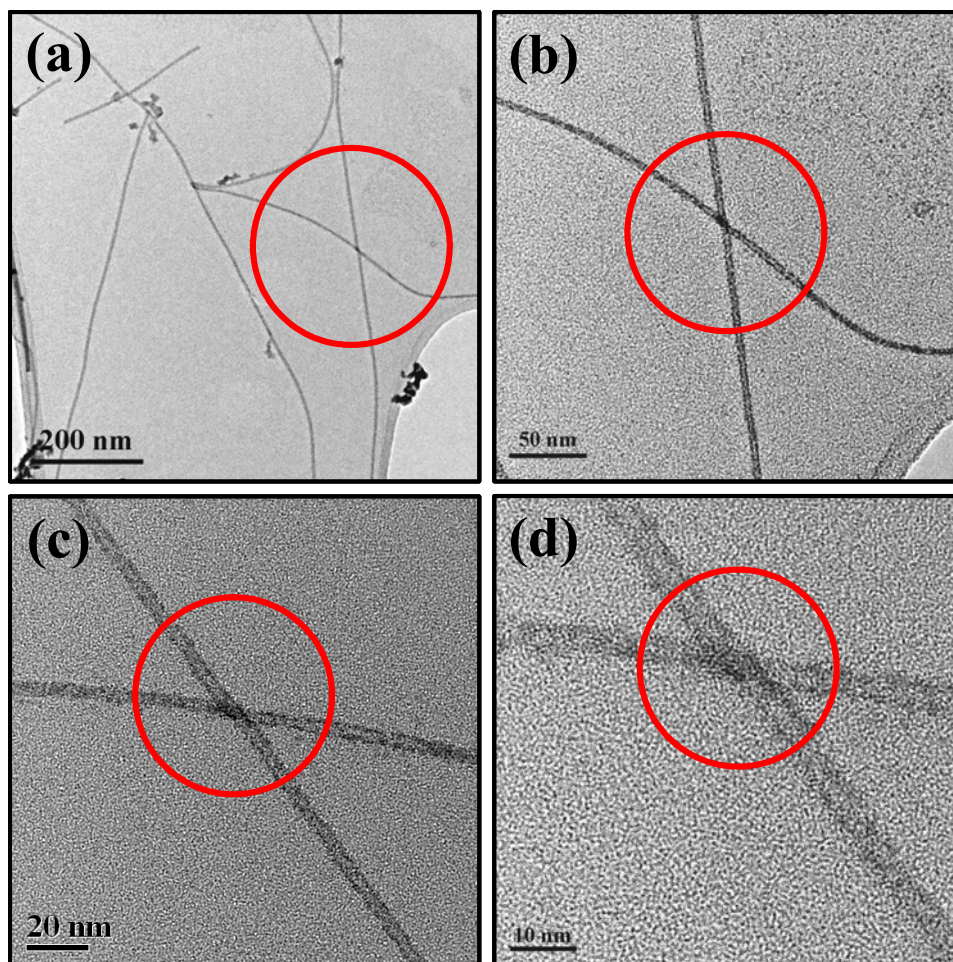

Supplement: b601764a.pdf [file b601764a.pdf]
